# Supplementary material
Source: Springer Nature journal article supplement (https://www.springermedizin.de/resource/supplementary/12876_2013_1085_MOESM2_ESM.pdf/9438454)

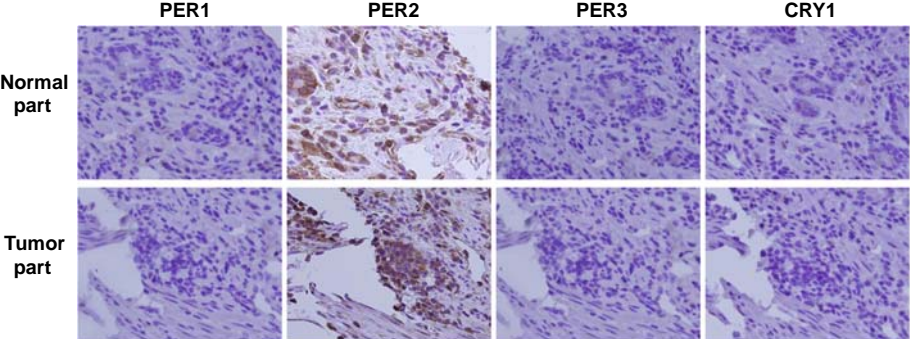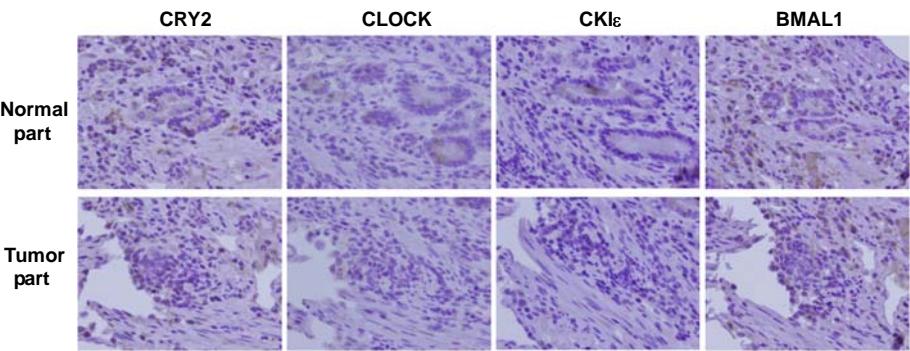

Supplement: MOESM2 [file 9438454]
